# Supplementary material for: Identification of MicroRNAs as Potential Blood-Based Biomarkers for Diagnosis and Therapeutic Monitoring of Active Tuberculosis
Source: MDPI journal article supplement (doi:10.3390/diagnostics12020369), 2022-02-01
Supplement: s1 [file s1]

Supplementary Data

# Identification of MicroRNAs as Potential Blood-Based Biomarkers for Diagnosis and Therapeutic Monitoring of Active Tuberculosis

Junseong Kim <sup>1,2,†</sup>, Heechul Park <sup>1,2,†</sup>, Sung-Bae Park <sup>1,2</sup>, Eun Ju Lee <sup>1,2</sup>, Min-A Je <sup>1,2</sup>, Eunsol Ahn <sup>3</sup>, Bora Sim <sup>4</sup>, Jiyoung Lee <sup>1</sup>, Hyunwoo Jin <sup>1,2</sup>, Kyung Eun Lee <sup>1,2</sup>, Sang-Nae Cho <sup>3,4</sup>, Young Ae Kang <sup>5</sup>, Hyejon Lee <sup>3,\*</sup>, Sunghyun Kim <sup>1,2,\*</sup> and Jungho Kim <sup>1,\*</sup>

<sup>1</sup> Department of Biomedical Laboratory Science, College of Health Sciences, Catholic University of Pusan, Busan 46252, Republic of Korea

<sup>2</sup> Clinical Trial Specialist Program for In Vitro Diagnostics, Brain Busan 21 Plus Program, Graduate School, Catholic University of Pusan, Busan 46252, Republic of Korea

<sup>3</sup> Clinical Vaccine Research Section, International Tuberculosis Research Center, Seoul 03772, Republic of Korea

<sup>4</sup> Department of Microbiology, Institute of Immunology and Immunological Disease, Yonsei University College of Medicine, Seoul 03772, Republic of Korea

<sup>5</sup> Division of Pulmonary and Critical Care Medicine, Department of Internal Medicine, Severance Hospital, Institute of Immunology and Immunological Disease, Yonsei University College of Medicine, Seoul 03772, Republic of Korea

† These authors contributed equally to this work.

\* Correspondence: hyeonlee@gmail.com (H.L.); shkim0423@cup.ac.kr (S.K.); jutosa70@cup.ac.kr (J.K.). Tel.: +82-2-2228-0772 (H.L.); +82-51-510-0560 (S.K.); +82-51-510-0660 (J.K.). Fax: +82-2-313-7190 (H.L.); +82-51-510-0568 (S.K., J.K.)

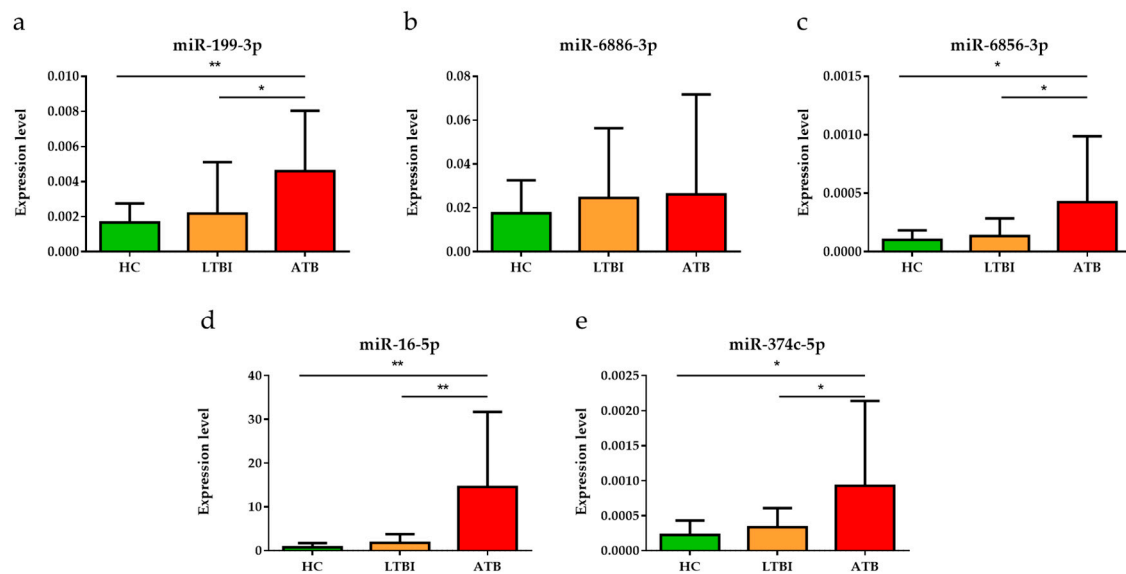

**Figure S1.** Validation of the expression levels of the selected miRNAs among study populations by qRT-PCR. The expression levels of (a) miR-199-3p (both miR-199a-3p and miR-199b-3p), (b) miR-6886-3p, (c) miR-6856-3p, (d) miR-16-5p, and (e) miR-374c-5p were measured in patients with active tuberculosis (ATB), individuals with latent tuberculosis infection (LTBI), and healthy controls (HCs). The data are shown as mean  $\pm$  standard deviation. \*  $p < 0.05$ , \*\*  $p < 0.01$ .
